# Supplementary material for: Immune Activation and Inflammatory Response Mediated by the NOD/Toll-like Receptor Signaling Pathway—The Potential Mechanism of Bullfrog (Lithobates catesbeiana) Meningitis Caused by Elizabethkingia miricola
Source: MDPI journal article supplement (doi:10.3390/ijms241914554), 2023-09-26
Supplement: s1 [file s1]

## Supplementary materials (Tables)

**Table S1.** The results about the comparison of clean reads with reference genome.

| Sample    | Total reads | Total mapped       | Multiple mapped  | Uniquely mapped    |
|-----------|-------------|--------------------|------------------|--------------------|
| Control-1 | 54,645,342  | 43,656,324(79.89%) | 1,424,065(2.61%) | 42,232,259(77.28%) |
| Control-2 | 54,541,358  | 43,677,586(80.08%) | 1,414,112(2.59%) | 42,263,474(77.49%) |
| Control-3 | 62,634,710  | 50,558,613(80.72%) | 1,720,655(2.75%) | 48,837,958(77.97%) |
| Eli-1     | 65,771,358  | 51,336,621(78.05%) | 1,673,533(2.54%) | 49,663,088(75.51%) |
| Eli-2     | 59,997,100  | 47,546,302(79.25%) | 1,478,613(2.46%) | 46,067,689(76.78%) |
| Eli-3     | 61,569,246  | 48,970,883(79.54%) | 1,518,183(2.47%) | 47,452,700(77.07%) |

**Table S2.** Histopathological assessment. An importance factor ( $\omega_{if}$ ), ranging from 1 to 3, was assigned to every change (1—minimal pathological importance: the lesion is easily reversible as exposure to irritants ends; 2—moderate pathological importance: the lesion is reversible in most cases if the stressor is neutralized; and 3—marked pathological importance: the lesion is generally irreversible, leading to partial or total loss of the organ function [33]).

| <b>Organ<br/>(Org)</b> | <b>Functional unit of the tissue<br/>(t)</b> | <b>Alteration<br/>(alt)</b> | <b>Importance factor<br/>(<math>\omega_{if}</math>)</b> |
|------------------------|----------------------------------------------|-----------------------------|---------------------------------------------------------|
| <b>Brain</b>           | Meninges/brain parenchyma                    | structural alterations      | 1                                                       |
| <b>Eye</b>             | Retina/cornea                                | hemorrhage                  | 1                                                       |
| <b>Kidney</b>          | Tubule/glomerulus                            | deposits                    | 1                                                       |
| <b>Heart</b>           | myocardium                                   | edema                       | 1                                                       |
| <b>Liver</b>           | Liver tissue/interstitial tissue             | hyperplasia                 | 2                                                       |
| <b>Intestinal</b>      | Mucosa layer                                 | infiltration                | 2                                                       |
| <b>Spleen</b>          | Interstitial tissue                          | Atrophy                     | 2                                                       |
| <b>Lung</b>            | Alveolar/capillaries                         | necrosis                    | 3                                                       |

Table S3. Primer sequences in this study.

| Gene name                       | Primer sequence (5'-3')                                | Size (bp) | GenBank accession number |
|---------------------------------|--------------------------------------------------------|-----------|--------------------------|
| <i>NFKB</i>                     | F: AGGAACAAGATCATCATAGAGGAC<br>R: TCAGAAAGAGGGGCCAAGTG | 157       | XM_040329914.1           |
| <i>COX2</i>                     | F: CGCAGCCTCCCCATTATAG<br>R: GATGCGAAGAGATGGGAGGG      | 217       | ON746668.1               |
| <i>IL-8</i>                     | F: ACCCTTACCCTCTTCCTGCT<br>R: TCAGCTTCACACACTGGCA      | 95        | XM_040335899.1           |
| <i>TLR4</i>                     | F: ACACCTTCAAGGCTCGCTAC<br>R: ATGATGGGTCGCCATCTTCC     | 278       | XM_040322748.1           |
| <i>CARD9</i>                    | F: AAAGGAGGCCACCATTAGGC<br>R: TCGCATGACAGCATTGGTCT     | 190       | XM_040324146.1           |
| <i><math>\beta</math>-actin</i> | F: TGCTCTGGACTTTGAGCAGG<br>R: ACTTGTCCATCAGGCAGCTC     | 84        | XM_040357114.1           |

F, forward primer; R, reverse primer. *NFKB*: nuclear factor kappa B, *COX2*: Cyclooxygenase 2, *IL-8*: interleukin-8-like, *TLR4*: toll like receptor 4, *CARD9*: caspase recruitment domain family member
